# Supplementary material for: MSX2 Initiates and Accelerates Mesenchymal Stem/Stromal Cell Specification of hPSCs by Regulating TWIST1 and PRAME
Source: PubMed Central journal article supplement (PMC6092836; doi:10.1016/j.stemcr.2018.06.019), 2018-07-19
Supplement: mmc1.pdf [file mmc1.pdf]

**Stem Cell Reports, Volume 11**

**Supplemental Information**

**MSX2 Initiates and Accelerates Mesenchymal Stem/Stromal Cell Specification of hPSCs by Regulating TWIST1 and PRAME**

**Leisheng Zhang, Hongtao Wang, Cuicui Liu, Qingqing Wu, Pei Su, Dan Wu, Jiaojiao Guo, Wen Zhou, Yuanfu Xu, Lihong Shi, and Jiayi Zhou**

# Figure. S1

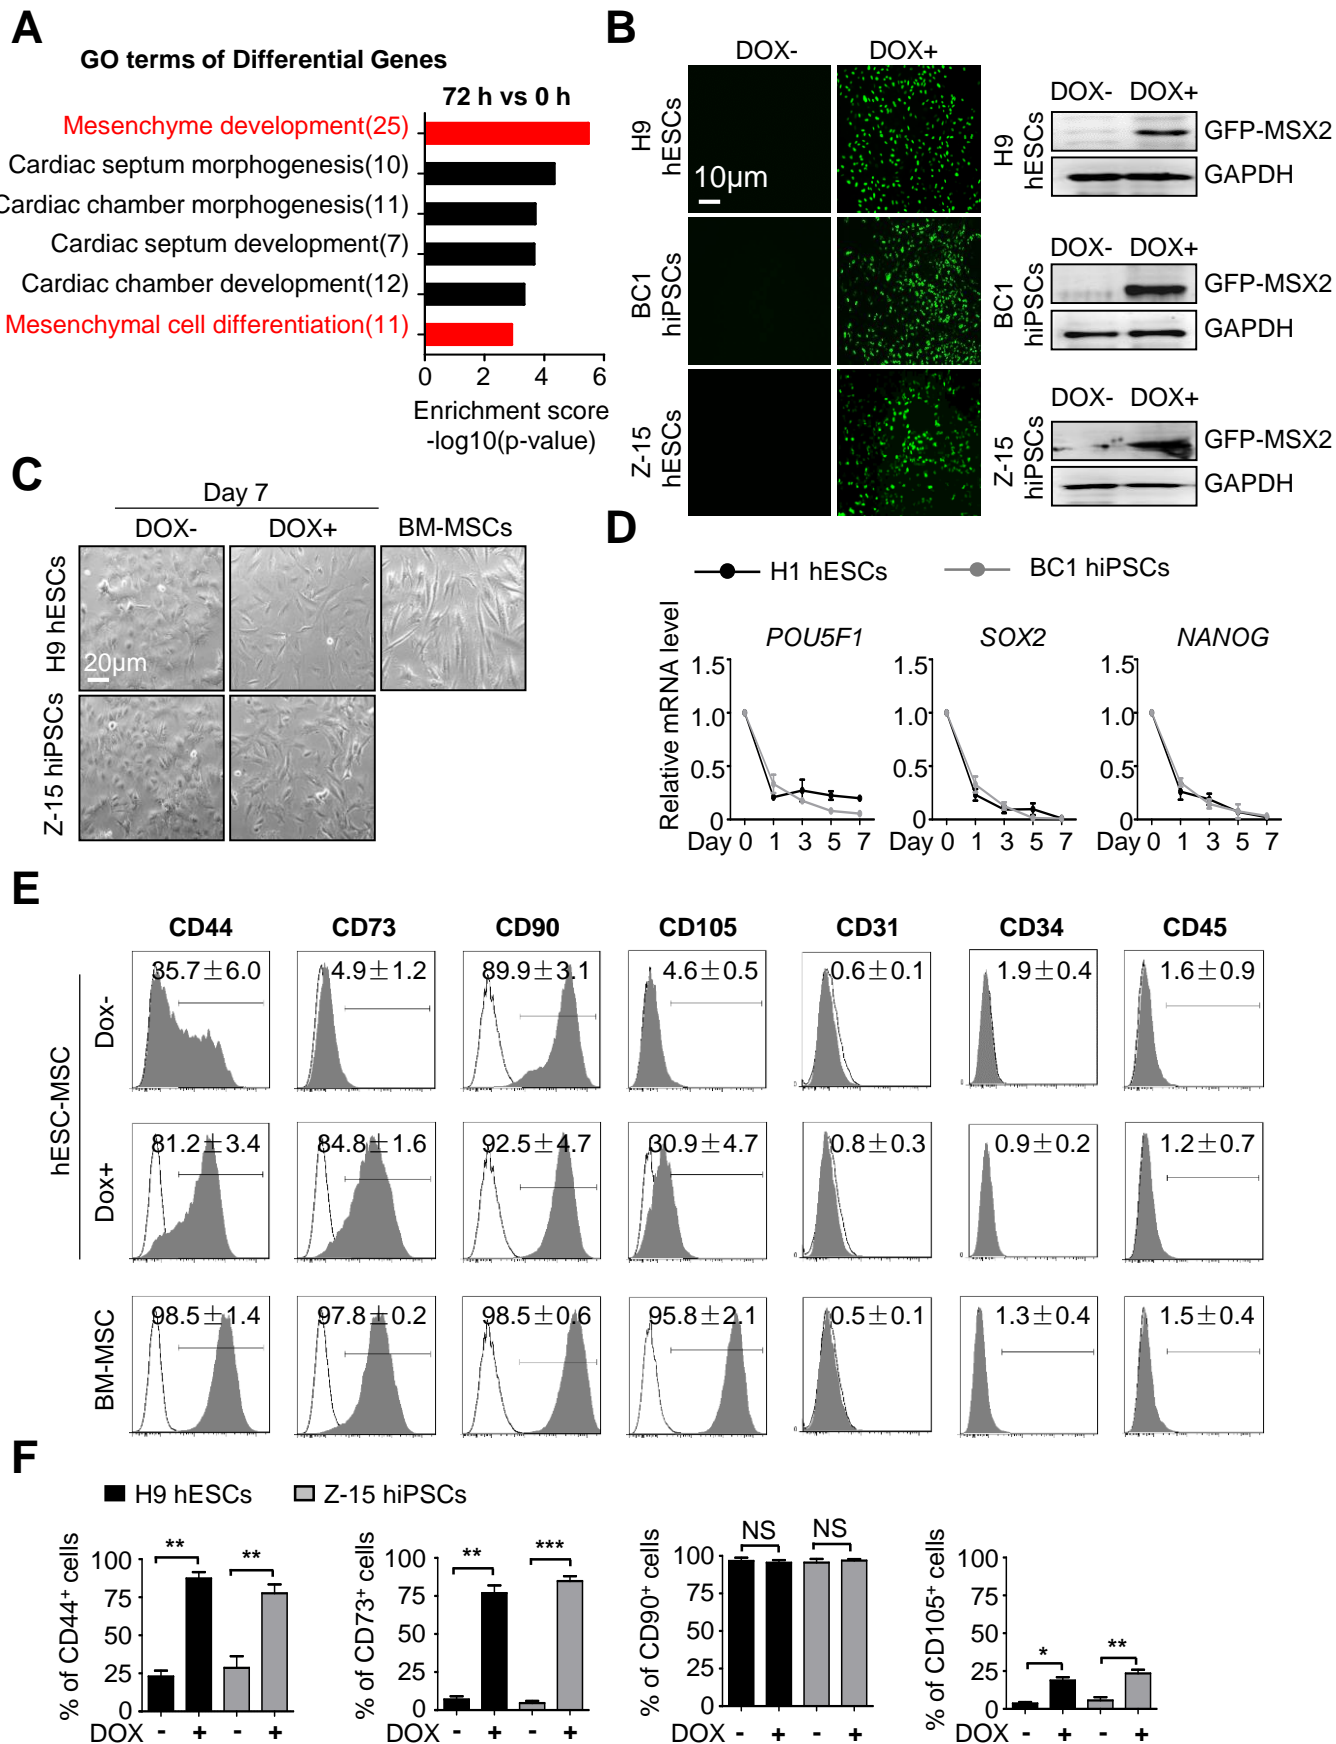

**Figure S1. Related to Figure 1. MSX2 initiates mesenchymal program in hPSCs.** (A) Gene ontology analysis for up-regulated genes in DOX-inducible GFP-MSX2 H1 hESCs with 3 $\mu$ g/ml DOX treatment (72h vs 0h). (B) Left panel: fluorescence images of GFP-MSX2 H9 hESCs, BC1 and Z-15 hiPSCs with or without DOX (3  $\mu$ g/ml) treatment for 48 h. Right panel: Western blot analysis of MSX2 in GFP-MSX2 H9 hESCs, BC1 and Z-15 hiPSCs with or without DOX (3  $\mu$ g/ml) treatment for 48 h. Scale bar=10 $\mu$ m. (C) Phase contrast images of GFP-MSX2 H9 hESCs and Z-15 hiPSCs during differentiation in DMEM/F12 media containing 2% FBS with or without DOX (3  $\mu$ g/ml) treatment. A time-course analysis is shown (from 0 h to 120 h). BM-MSCs was used as a control. Scale bar=20 $\mu$ m. (D) Time-course analysis of the pluripotent genes (POU5F1, SOX2 and NANOG) expression in GFP-MSX2 H1 hESCs and BC1 hiPSCs with DOX (3  $\mu$ g/ml) treatment for indicated time by qRT-PCR. All values are normalized to the level (= 1) of mRNA in the cells before adding DOX (0 h). Results are shown as mean  $\pm$  SEM (N=3). (E) FCM analysis for MSC markers (CD44, CD73, CD90, CD105), endothelial markers (CD31, CD34) and hematopoietic marker (CD45) of GFP-MSX2 H1 hESCs cultured in DMEM/F12 media containing 2% FBS with or without DOX (3  $\mu$ g/ml) treatment for 7 days. All data are shown as mean  $\pm$  SEM. (F) FCM analysis of MSC markers (CD44, CD73, CD90, CD105) of GFP-MSX2 H9 hESCs and Z-15 hiPSCs cultured in DMEM/F12 media containing 2% FBS with or without DOX (3  $\mu$ g/ml) treatment for 7 days. All data are shown as mean  $\pm$  SEM (N=3).

**Figure. S2**

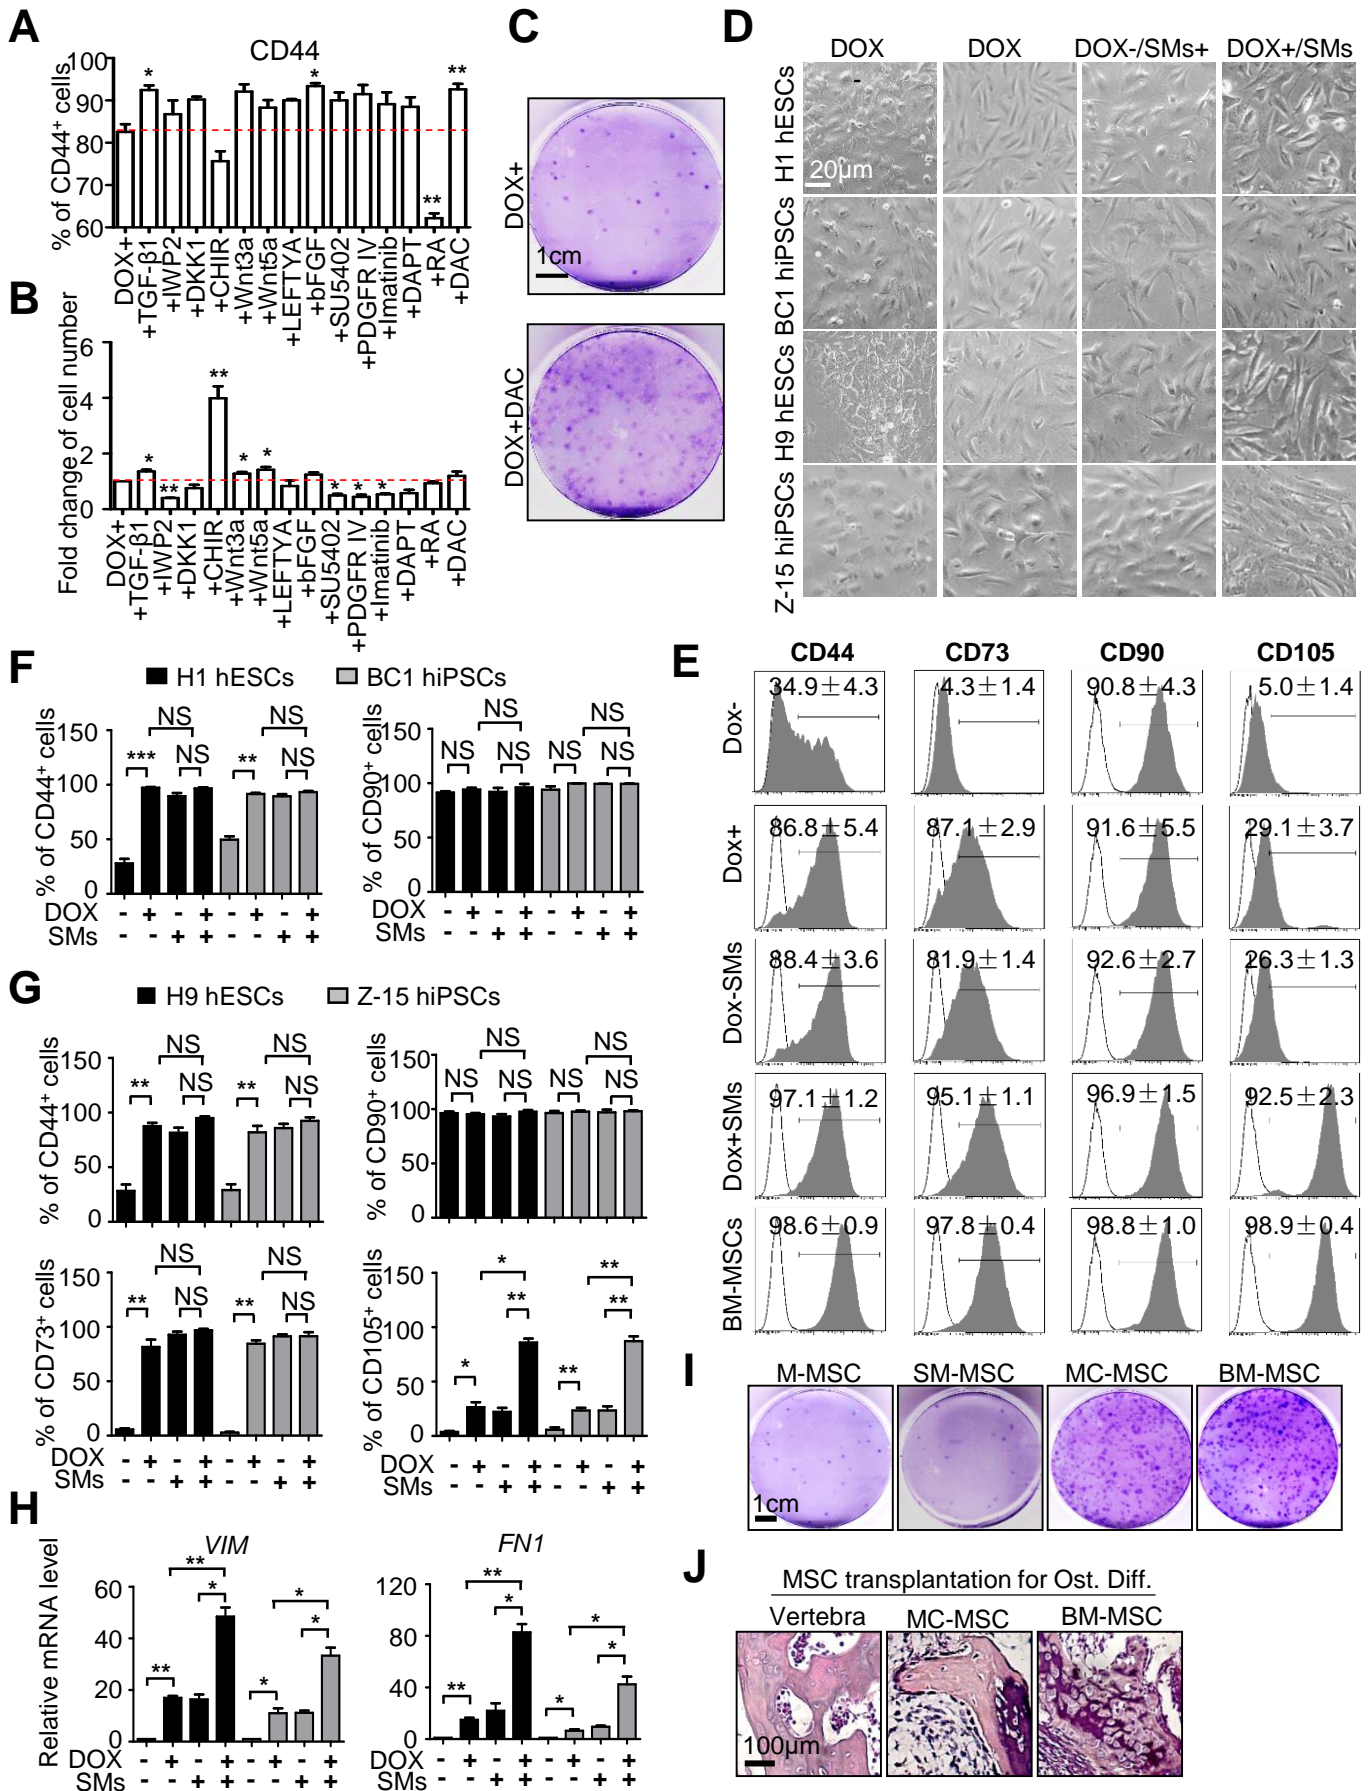

**Figure S2. Related to Figure 2. Chemical Compounds further facilitate the MSCs generation initiated by MSX2.** (A) FCM analysis for MSCs markers (CD44) of GFP-MSX2 H1 hESCs cultured in DMEM/F12 media containing 2% FBS and 3  $\mu\text{g/ml}$  DOX with indicated chemical compound (see Supplemental Table S3) treatment for 7 days. IWP2 (2 $\mu\text{M}$ ), DKK1 (200nM), CHIR (2 $\mu\text{M}$ ), Wnt3a (10nM), Wnt5a (10nM), LEFTYA (500nM), SU5402 (2 $\mu\text{M}$ ), PDGFR IV (5nM), Imatinib (10mg/ml), DAPT (10nM), RA (5nM). All data are shown as mean  $\pm$  SEM (N=3), \*,  $P<0.05$ ; \*\*,  $P<0.01$ ; NS, not significant (not shown). (B) Fold change of total cell number after treatment as shown in Figure S2A. All values were normalized to the level (= 1) of the group without chemical compound treatment. All data are shown as mean  $\pm$  SEM (N=3), \*,  $P<0.05$ ; \*\*,  $P<0.01$ ; NS, not significant. (C) 100 GFP-MSX2 H1 hESC-derived cells with DOX+ or DOX+DAC were seeded in 10 cm dish with 10%FBS/DMEM-F12 media and cultured for two weeks. The colonies were fixed and stained by crystal violet dye before being scanned. Scale bar, 1cm. (D) Phase contrast images of GFP-MSX2 hPSCs (H1 and H9 hESCs, BC1 and Z-15 hiPSCs) after treatment with DOX-, DOX+, DOX-SMs, DOX+SMs for 7 days. Scale bar=20 $\mu\text{m}$ . (E) FCM analysis for MSC markers (CD44, CD90, CD73 and CD105) of GFP-MSX2 H1 hESCs cultured in DMEM/F12 media containing 2% FBS with DOX-, DOX+, DOX-SMs, DOX+SMs treatment for 7 days. (F) FCM analysis for MSC markers (CD44, CD90, CD73 and CD105) in GFP-MSX2 H1 hESCs and BC1 hiPSCs cultured in DMEM/F12 media containing 2% FBS with DOX-, DOX+, DOX-SMs, DOX+SMs treatment for 7 days. All data are shown as mean  $\pm$  SEM (N=3), \*\*,  $P<0.01$ ; \*\*\*,  $P<0.001$ ; NS, not significant. (G) FCM analysis for CD44, CD73, CD90, CD105 expression in GFP-MSX2 H9 hESCs and Z-15 hiPSCs after treatment with DOX-, DOX+, DOX-SMs, DOX+SMs for 7 days. Results are shown as mean  $\pm$  SEM (N=3). \*,  $P<0.05$ ; \*\*,  $P<0.01$ ; \*\*\*,  $P<0.001$ ; NS, not significant. (H) qRT-PCR analysis of MSC markers (VIM, FN1) in GFP-MSX2 H1 hESCs and BC1 hiPSCs after treatment with indicated treatments for 7 days. All values are normalized to the level (= 1) of mRNA in the group (DOX-). Data are shown as mean $\pm$ SEM (N=3). \* $P<0.05$ ; \*\* $P<0.01$ . (I) 100 derived M-MSCs, SM-MSCs, MC-MSCs or BM-MSCs were seeded in 10 cm dish with 10%FBS/DMEM-F12 media and cultured for two weeks. The colonies were fixed and stained by crystal violet dye before being scanned. Scale bar, 1cm. (J) Bone formation in vivo by M-MSCs or MC-MSCs derived from H1 hESCs in 6-week nude mice. Vertebra of 6-week nude mice was used as a positive control. Scale Bar, 100  $\mu\text{m}$ .

# Figure. S3

## A

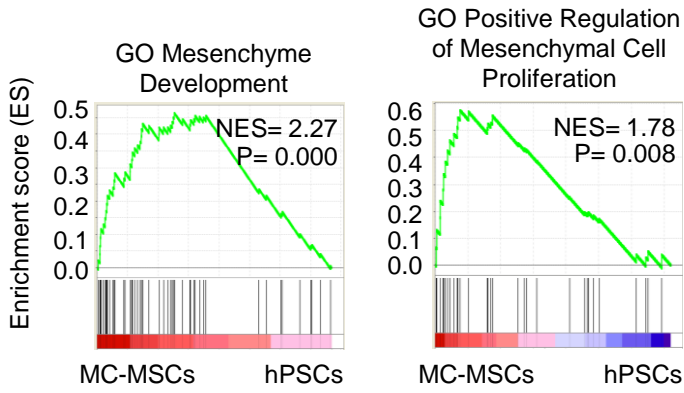

## B

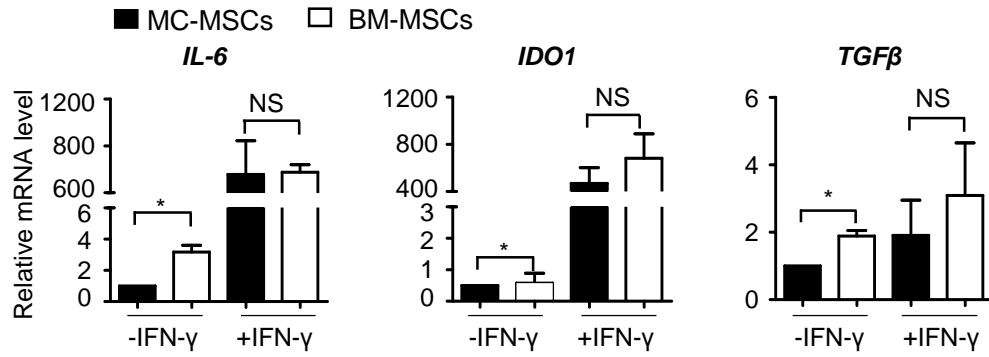

## C

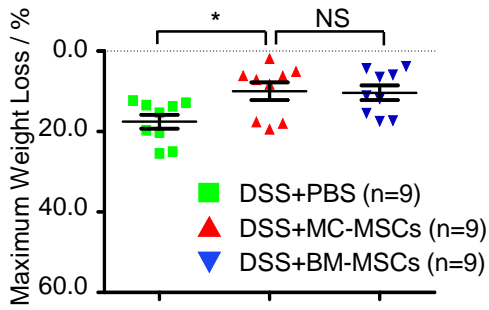

## D

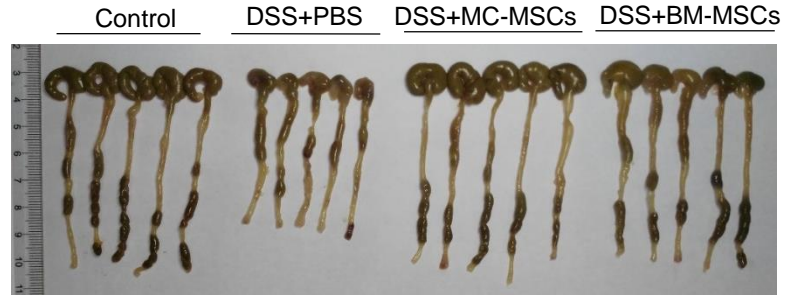

## E

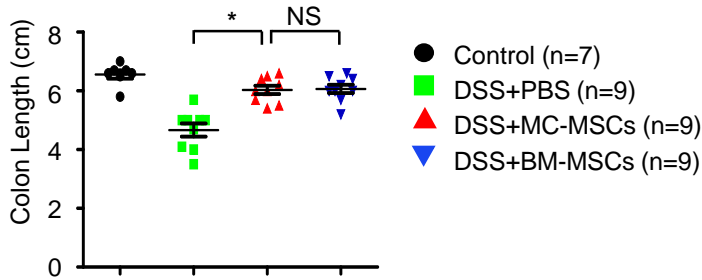

**Figure S3. Relative to Figure 3. MC-MSCs resemble BM-MSCs and show similar therapeutic effect on mice colitis as BM-MSCs.** (A) Gene set enrichment analysis (GSEA) comparing MC-MSCs and hPSCs. The normalized enrichment scores (NES) and *P* values are showed in each plot. (B) MC-MSCs or BM-MSCs were cultured in 10% FBS/DMEM-F12 media with or without 10 ng/ml human IFN- $\gamma$  for 24 h. The expression of IL-6, IDO1, TGF $\beta$  were measured by qRT-PCR analysis. All data are shown as mean $\pm$ SEM (N=3). (C) The maximum proportion of body weight loss for mice in the DSS treated groups (DSS+PBS, DSS+MC-MSCs, DSS+BM-MSCs). Results are shown as mean $\pm$ SEM. All data were analyzed by students' T test, \*, *P*<0.05; NS, not significant. (D) Images of colons dissected from mice in the four groups (DSS+PBS, DSS+MC-MSCs, DSS+BM-MSCs) at day 13 of the experiment. (E) The length of colons dissected from mice in the four groups at day 13 of the experiment. Data are analyzed using paired T test and shown as mean $\pm$ SEM, \**P*<0.001; NS, not significant.

# Figure. S4

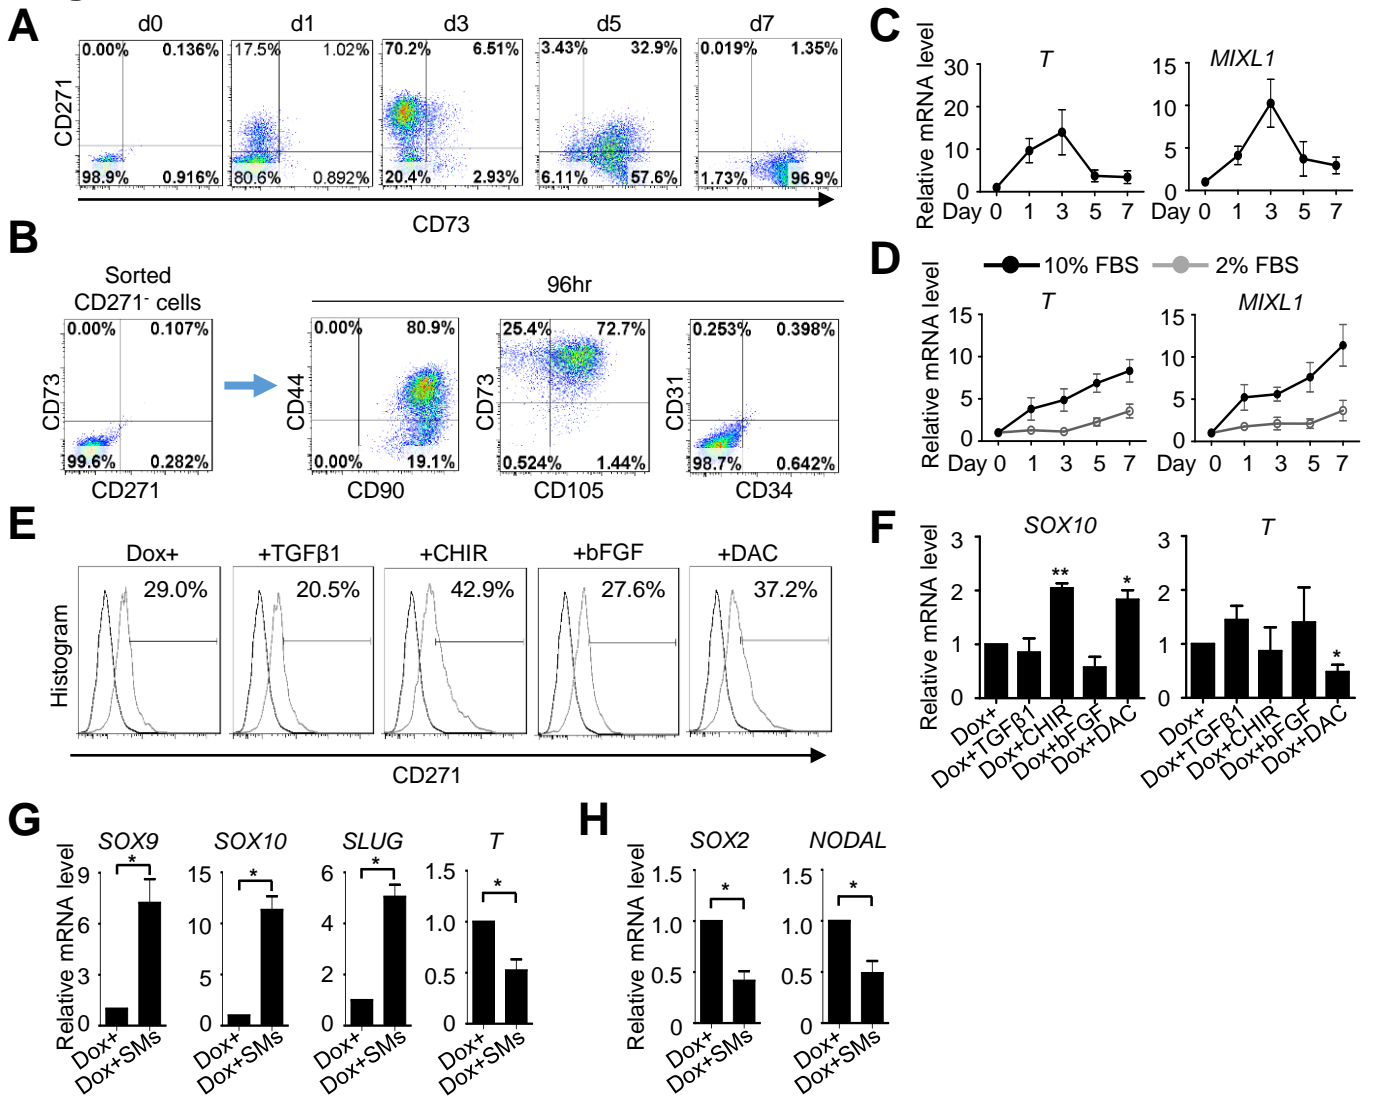



**Figure S4. Relative to Figure 4. Transcriptome analysis of DEGs during MSCs generation of hPSCs.** (A) FCM analysis for the percentage of CD271<sup>+</sup> and CD73<sup>-</sup> cells(NCCs) in GFP-MSX2 H1 hESCs with DOX+SMs treatment at indicated time points of MSC induction. (B) MSC potential analysis of CD271<sup>-</sup> cells derived from inducible GFP-MSX2 H1 hESCs. CD271<sup>-</sup> cells were isolated at day3 of differentiation and cultured under DOX+SMs conditions for 96 hours, followed by FCM analysis. (C) qRT-PCR analysis of the dynamic expression for mesoendoderm associated genes (T, MIXL1) during MSC induction from DOX-inducible GFP-MSX2 overexpressing H1 hESCs under DOX+SMs conditions. All data are shown as mean  $\pm$  SEM (N=3). (D) qRT-PCR analysis of the dynamic mRNA expression for mesoendoderm (T, MIXL1) associated genes in H1 hESCs under 2%, 5% FBS condition at indicated time points. All data are shown as mean  $\pm$  SEM (N=3). (E) FCM analysis for the percentage of CD271<sup>+</sup> NCCs in GFP-MSX2 H1 hESCs with DOX+, DOX+TGF  $\beta$  1, DOX+bFGF, DOX+CHIR, DOX+DAC treatment at day 3 of MSC induction. (F) qRT-PCR analysis of the expression of NCCs (SOX10) and mesoendoderm (T) associated genes in GFP-MSX2 H1 hESCs with DOX+, DOX+TGF  $\beta$  1, DOX+bFGF, DOX+CHIR, DOX+DAC treatment at day 3 of MSC induction. (G) qRT-PCR analysis of the expression of NCCs (SOX9, SOX10, SLUG) and mesoendoderm (T) associated genes in GFP-MSX2 H1 hESCs with DOX+, DOX+SMs treatment at day 3 of MSC induction. (H) qRT-PCR analysis of the expression of SOX2 and NODAL in GFP-MSX2 H1 hESCs with DOX+, DOX+SMs treatment at day 3 of MSC induction.

# Fig. S5

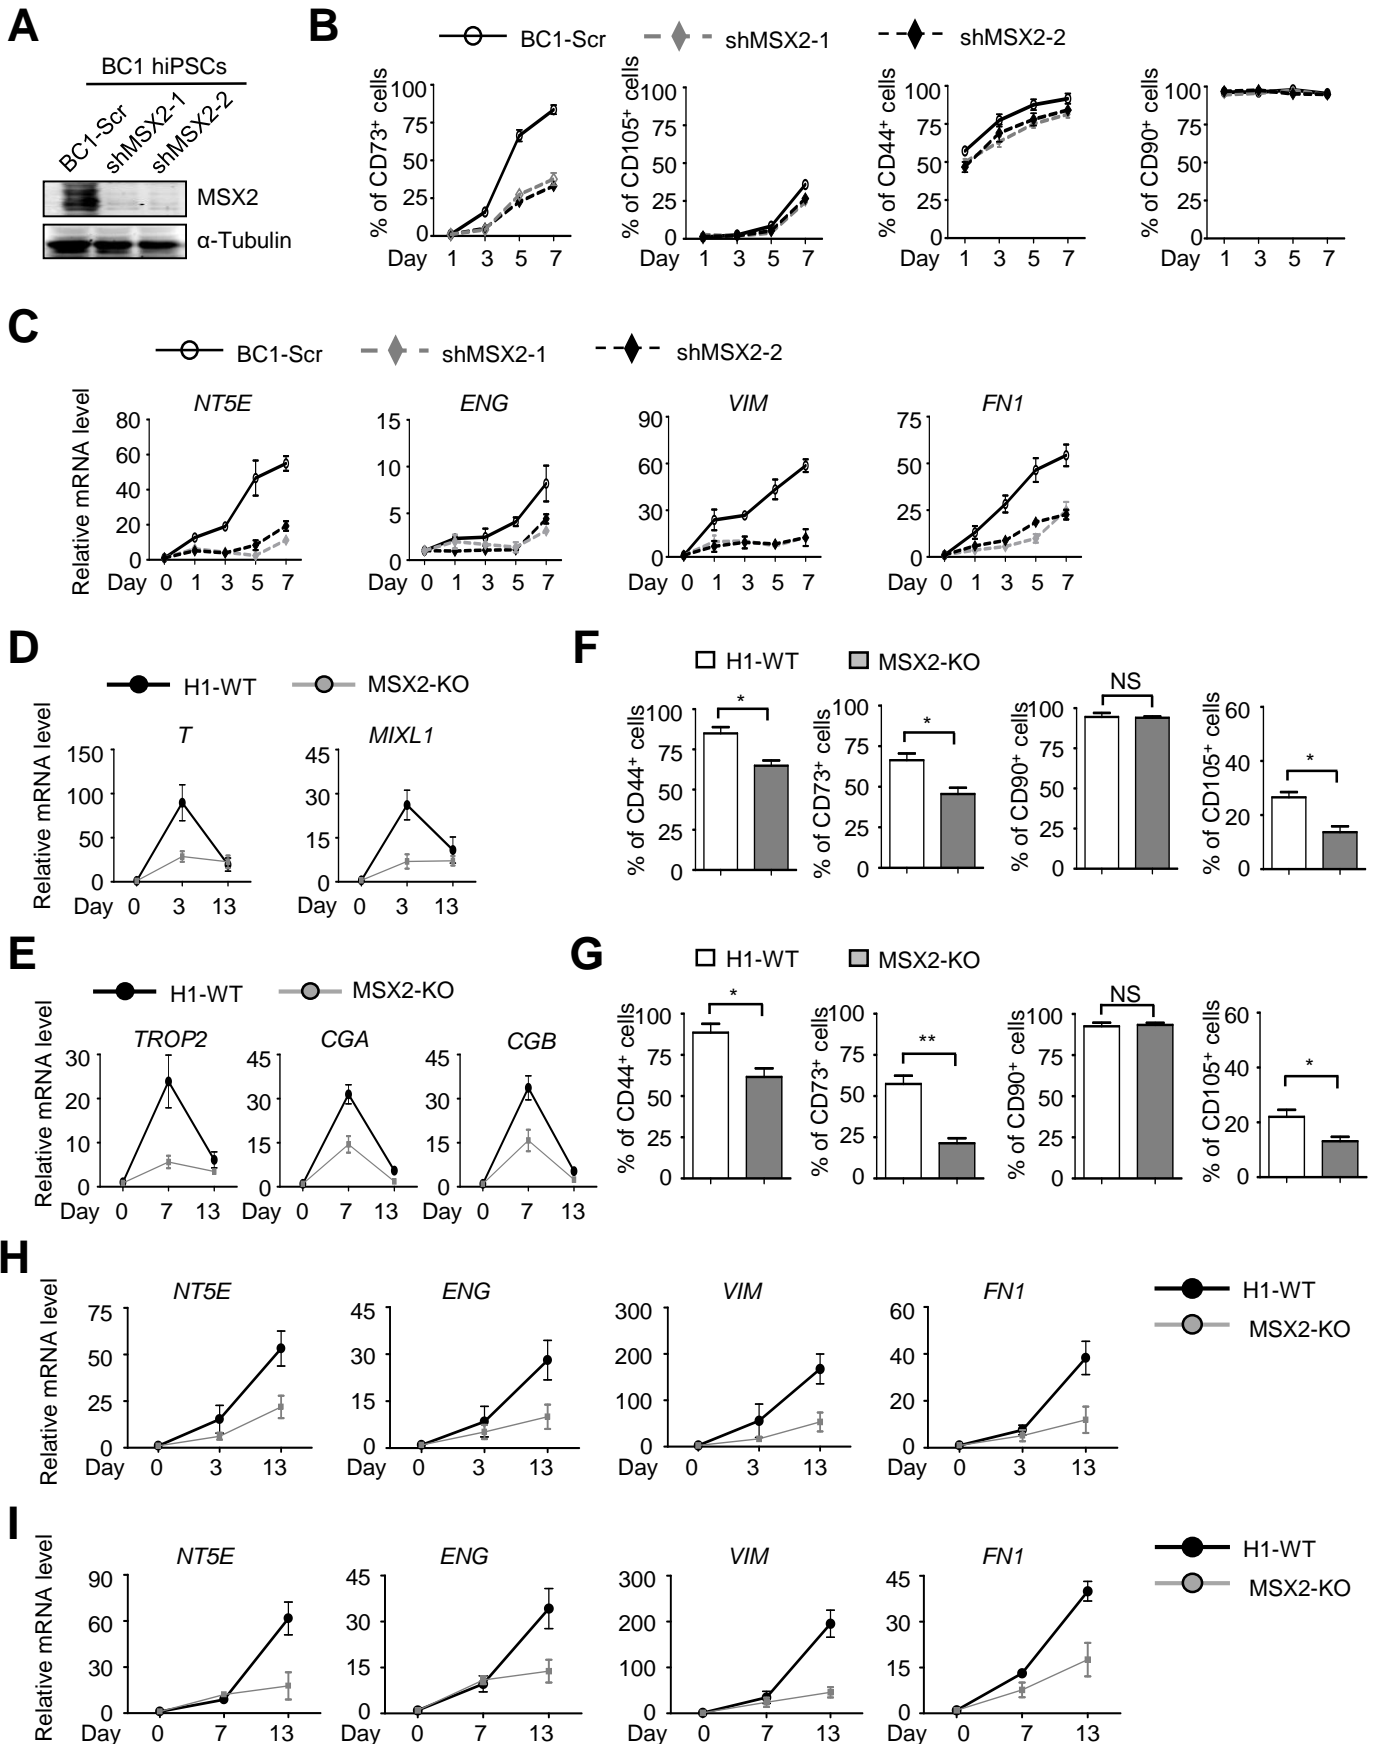

**Figure S5. Relative to Figure 5. MSX2 depletion impaired the neural crest, mesoderm or trophoblast derived MSCs.** (A) Western-blotting analysis conformed the expression of MSX2 in BC1 hiPSCs depleted of MSX2 or expressing a scramble shRNA (Scr) after MSC induction for 7 days under SM conditions.  $\alpha$ -Tubulin was used as a loading control. (B) FCM analysis for MSC markers (CD44, CD73, CD90, CD105) for indicated time in BC1 hiPSCs depleted of MSX2 or expressing a Scr shRNA after MSC induction under SMs conditions (mean $\pm$ SEM, N=3). (C) Time-course analysis of MSC-specific markers (NT5E, ENG, VIM, FN1) in BC1 hiPSCs depleted of MSX2 or expressing a Scr shRNA after MSC induction under SMs conditions. All values are normalized to the level (= 1) of mRNA in the cells before adding DOX (0 h) (mean $\pm$ SEM, N=3). (D) qRT-PCR analysis of the dynamic mRNA expression for mesoendoderm associated genes (T, MIXL1) during MSC induction from WT H1 and MSX2-deleted H1 hESCs under EB conditions. All data are shown as mean  $\pm$  SEM (N=3). (E) qRT-PCR analysis of the dynamic mRNA expression for trophoblast associated genes (TROP2, CGA, CGB) during MSC induction from WT H1 and MSX2-deleted H1 hESCs under TB-MSC deriving conditions. All data are shown as mean  $\pm$  SEM (N=3). (F) FCM analysis for MSC markers (CD44, CD73, CD90, CD105) in WT H1 and MSX2-deleted H1 hESCs after MSC induction under mesoendoderm-MSC deriving conditions. All data are shown as mean  $\pm$  SEM (N=3). \*P<0.05; NS, not significant. (G) FCM analysis for MSC markers (CD44, CD73, CD90, CD105) in WT H1 and MSX2-deleted H1 hESCs after MSC induction under TB-MSC deriving conditions. All data are shown as mean  $\pm$  SEM (N=3). \*P<0.05; \*P<0.01; NS, not significant. (H) qRT-PCR analysis of the dynamic mRNA expression for MSC markers (NT5E, ENG, VIM, FN1) during MSC induction from WT H1 and MSX2-deleted H1 hESCs under EB conditions. All data are shown as mean  $\pm$  SEM (N=3). (I) qRT-PCR analysis of the dynamic mRNA expression for MSC markers (NT5E, ENG, VIM, FN1) during MSC induction from WT H1 and MSX2-deleted H1 hESCs under TB-MSC deriving conditions. All data are shown as mean  $\pm$  SEM (N=3).

**Figure. S6**

**A**

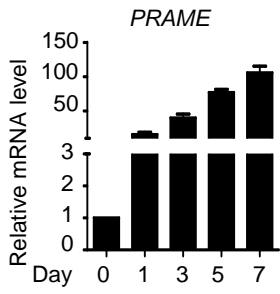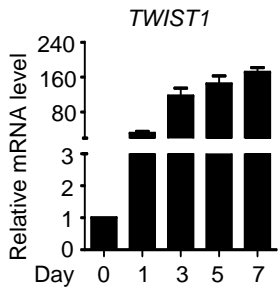

**B**

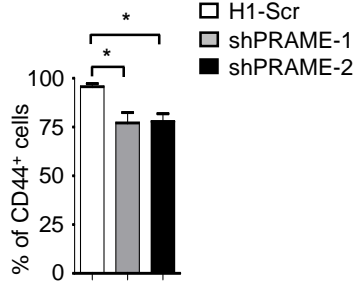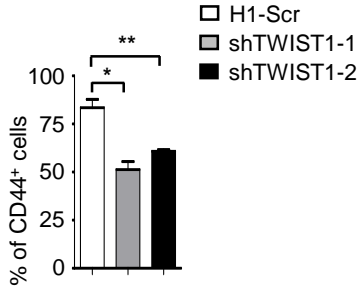

**C**

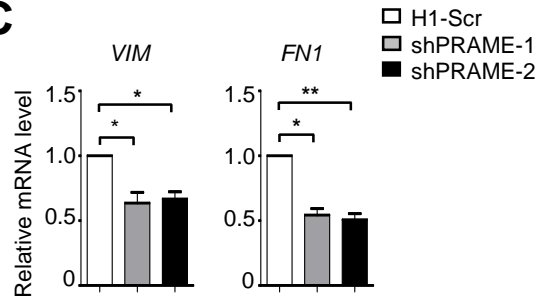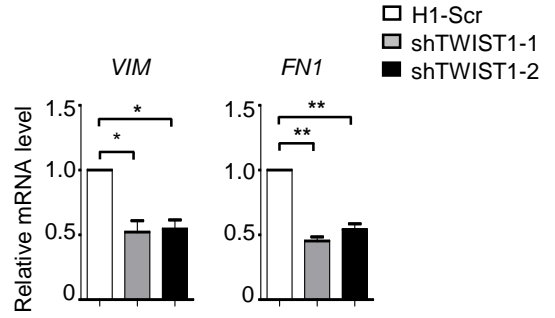

**Figure S6. Relative to Figure 6. The depletion of PRAME or TWIST1 impaired MSC generation.**

(A) qRT-PCR analysis of the dynamic mRNA expression for PRAME or TWIST1 during MSC induction from H1 hESCs under SM conditions. All data are shown as mean  $\pm$  SEM (N=3). (B) FCM analysis for MSC markers (CD44) in H1 hESCs depleted of PRAME or TWIST1 or expressing a Scr shRNA after MSC induction for 7 days under SMs conditions (mean $\pm$ SEM, N=3). \*P<0.05; \*\*P<0.01. (C) qRT-PCR analysis of MSC-specific markers (VIM, FN1) in H1 hESCs depleted of PRAME or TWIST1 or expressing a Scr shRNA after MSC induction for 7 days under SM conditions (mean $\pm$ SEM, N=3). \*P<0.05; \*\*P<0.01.

**Fig. S7****A**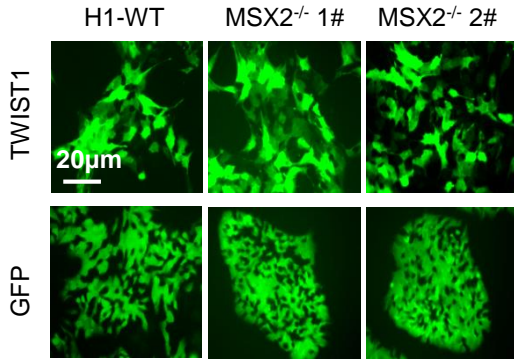**B**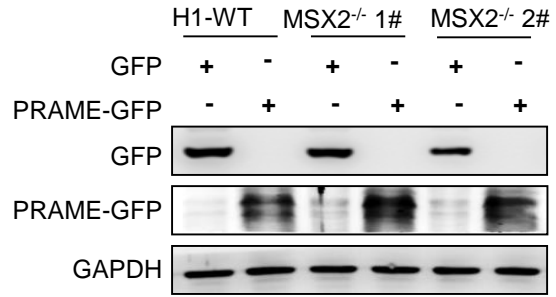**C**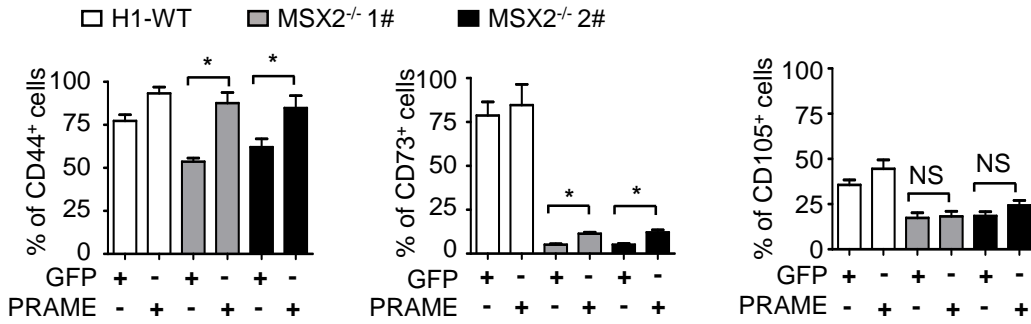**D**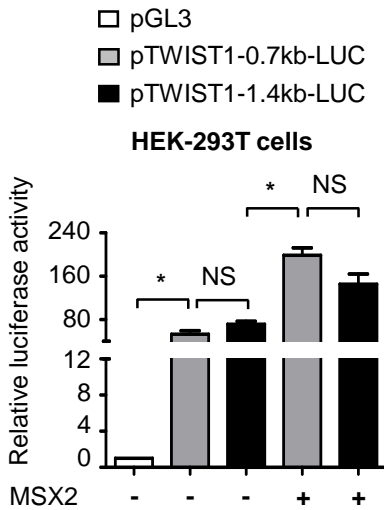**E**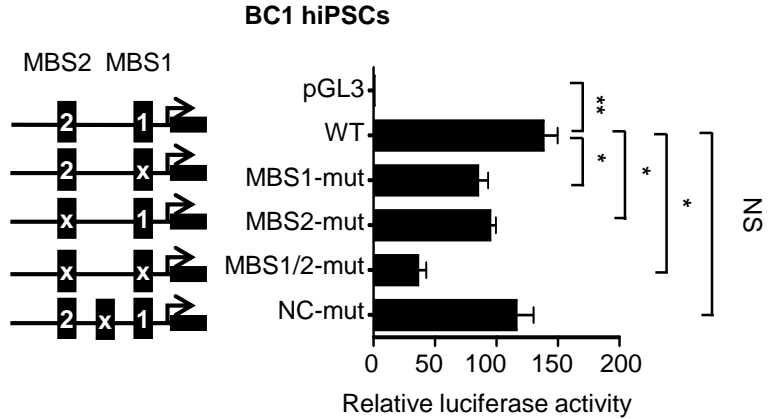

**Figure S7. Relative to Figure 7. MSX2 directly targets TWIST1 during mesenchymal differentiation.** (A) Fluorescence images of WT H1 and MSX2-deleted H1 cells (MSX2<sup>-/-</sup> 1#; MSX2<sup>-/-</sup> 2#) infected with a GFP or TWIST1-GFP vector at day 7 of MSC induction under SMs conditions. Scale bar=20µm. (B) Western blotting analysis of exogenous PRAME or GFP in WT H1 and MSX2-deleted H1 cells (MSX2<sup>-/-</sup> 1#; MSX2<sup>-/-</sup> 2#) at day 7 of MSC induction under SMs conditions. GAPDH was used as a loading control. (C) FCM analysis of MSC markers (CD44, CD73, CD105) in H1 and MSX2-deleted H1 cells (MSX2<sup>-/-</sup> 1#; MSX2<sup>-/-</sup> 2#) without or with PRAME overexpression at day 7 of MSC induction under SMs conditions. All data are shown as mean ± SEM (N=3). \*, *P*<0.05; NS, not significant. (D) Relative luciferase activity in HEK-293T cells co-transfected with psin-EF1α-MSX2 vector and pGL3 basic luciferase construct or pGL3 construct containing TWIST1 promoter (pTWIST1-0.7kb-LUC, pTWIST1-1.4kb-LUC). Renilla plasmid was co-transfected as an internal control. All values are normalized to the level (= 1) of the luciferase activity in cells transfected with pGL3 empty vector. All data are shown as means ± SEM (N=3), \*, *P*<0.05; NS, not significant. (E) Relative luciferase activity in GFP-MSX2 BC1 hiPSCs transfected with WT or MSX2-binding site mutated (MBS1-mut, MBS1-mut, MBS1/2-mut) TWIST1 promoter-luciferase reporter constructs with DOX (3 µg/ml) treatment for 3 days. A non-specific mutant in TWIST1 5' flanking region was used as a negative control (NC-mut). All values were normalized to the level (= 1) of the luciferase activity in cells transfected with pGL3 basic vector. Results are shown as mean ± SEM (N=3). \*, *P*<0.05; \*\*, *P*<0.001; NS, not significant.

## Supplemental Tables

**Table S1. Antibodies Used in This Study. Related to Fig. 1-7 and Fig. S1-S7.**

**Antibodies for FCM.** Related to Fig. 1-7 and Fig. S1, S2, S4, S6.

| Antibody                       | Cat. NO.   | Source       |
|--------------------------------|------------|--------------|
| Anti-human CD44-PE             | 550989     | BD Pharmigen |
| Anti- human CD90-APC           | 328113     | BioLegend    |
| Anti- human CD73-PercP CY5.5   | 46-0739-42 | eBioscience  |
| Anti- human CD73-PE            | 550257     | BD Pharmigen |
| Anti- human CD105-APC          | 323208     | BioLegend    |
| Anti- human CD31-PE            | 555446     | BD Pharmigen |
| Anti- human CD34-APC           | 555824     | BD Pharmigen |
| Anti- human CD45-PE            | 560975     | BD Pharmigen |
| Anti- human CD271-PE           | 557196     | BD Pharmigen |
| Anti- human CD271-APC          | 345107     | BioLegend    |
| Anti-mouse CD3e-PE             | 100307     | BioLegend    |
| Anti- mouse CD4                | 100516     | BioLegend    |
| Anti- mouse CD8a               | 100721     | BioLegend    |
| Anti- mouse CD8-APC            | 47-0081-82 | eBioscience  |
| Anti-mouse-CD3e                | 100314     | BioLegend    |
| Anti-mouse-CD28                | 16-0281-85 | eBioscience  |
| Molecular proles Sulfate latex | A37302     | Invitrogen   |

**Antibodies for Western-blotting assay.** Related to Fig. 5-7 and Fig. S1, S5, S7.

| Name              | Company     | Catalog    | Host   | Dilution |
|-------------------|-------------|------------|--------|----------|
| MSX2              | SANTA CRUZ  | Sc-15396   | Rabbit | 1:300    |
| TWIST1            | GeneTex     | GTX50821   | Rabbit | 1:500    |
| PRAME             | SANTA CRUZ  | sc-137188  | Mouse  | 1:1000   |
| GFP               | ProteinTech | 66002-1-Ig | Mouse  | 1:2000   |
| $\alpha$ -Tubulin | Abcam       | Ab11304    | Mouse  | 1:10000  |
| GAPDH             | Proteintech | 10494-1-AP | Rabbit | 1:2000   |



**Table S2. Primers Used in This Study. Related to Fig. 1-2, 4-7 and Fig S1- S7.****qRT-PCR primer sequences.** Related to Fig. 1-2, 4-7 and Fig. S1-S7.

| Gene          | Forward Primer          | Reverse Primer            |
|---------------|-------------------------|---------------------------|
| <i>ACTIN</i>  | CTCTTCCAGCCTTCCTTCCT    | AGCACTGTGTGTTGGCGTACAG    |
| <i>POU5F1</i> | CTTGAATCCCGAATGGAAAGGG  | GTGTATATCCCAGGGTGATCCTC   |
| <i>SOX2</i>   | GCCGAGTGGAAACTTTTGTCG   | GGCAGCGTGTACTIONTATCCTTCT |
| <i>NANOG</i>  | TTTGTGGGCCTGAAGAAAAC    | AGGGCTGTCCTGAATAAGCAG     |
| <i>MSX2</i>   | TTACCACATCCCAGCTCCTC    | CCTGGGTCTCTGTGAGGTTT      |
| <i>TWIST1</i> | GTCCGCAGTCTTACGAGGAG    | GCTTGAGGGTCTGAATCTTGCT    |
| <i>PRAME</i>  | AGCCTTTGACGGGAGACAC     | GAGTTCTTCCGTAAATCCAGCA    |
| <i>RUNX2</i>  | CTCACTACCACACCTACCTG    | TCAATATGGTCGCCAAACAGATTC  |
| <i>BGLAP</i>  | GGCGCTACCTGTATCAATGG    | TCAGCCAACTCGTCACAGTC      |
| <i>SOX9</i>   | AATGGAGCAGCGAAATCAAC    | CAGAGAGATTTAGCACACTGATC   |
| <i>COL2A1</i> | TGGACGCCATGAAGTTTTCT    | TGGGAGCCAGATTGTCATCTC     |
| <i>PPAR-γ</i> | GCTGGCCTCCTTGATGAATA    | TGTCTTCAATGGGCTTCACA      |
| <i>FABP4</i>  | TATGAAAGAAGTAGGAGTGGGC  | CCACCACCAGTTTATCATCCTC    |
| <i>ADIPOQ</i> | TGGTCCTAAGGGAGACATCG    | TGGAATTTACCAGTGGAGCC      |
| <i>ACAN</i>   | CCCCTGCTATTTTCATCGACCC  | GACACACGGCTCCACTTGAT      |
| <i>NT5E</i>   | GGGCGGAAGGTTCTCTGTAG    | GAGGAGCCATCCAGATAGACA     |
| <i>ENG</i>    | AGCCCCACAAGTCTTGCGAG    | GCTAGTGGTATATGTCACCTCGC   |
| <i>VIM</i>    | GAAGAGAACTTTGCCGTTGAAG  | GAAGGTGACGAGCCATTT        |
| <i>FNI</i>    | TGACCCCTACACAGTTTCCCA   | TGATTCAGACATTCGTTCCAC     |
| <i>GAPDH</i>  | GAGGTGTGAGTGGGATGGTGG   | GCCTGCTTCACCACCTTCTTG     |
| <i>SOX9</i>   | AGCGAACGCACATCAAGAC     | CTGTAGGCGATCTGTTGGGG      |
| <i>SOX10</i>  | CCTCACAGATCGCCTACACC    | CATATAGGAGAAGGCCGAGTAGA   |
| <i>CD271</i>  | CCTACGGCTACTACCAGGATG   | CACACGGTGTCTGTCTTGT       |
| <i>FOXD3</i>  | GCAACTACTGGACCCTGGAC    | CTGTAAGCGCCGAAGCTCT       |
| <i>IL-6</i>   | ACTCACCTCTTCAGAACGAATTG | CCATCTTTGGAAGGTTTCAGGTTG  |
| <i>IDO1</i>   | GCCAGCTTCGAGAAAGAGTTG   | ATCCCAGAACTAGACGTGCAA     |
| <i>TGFβ</i>   | GGCCAGATCCTGTCCAAGC     | GTGGGTTTCCACCATTAGCAC     |
| <i>TROP2</i>  | GAGATTCCCCCGAAGTTCTC    | AACTCCCCCAGTTCCTTGAT      |
| <i>CGA</i>    | TGCCCAGAATGCACGCTAC     | TTGGACCTTAGTGGAGTGGGA     |
| <i>CGB</i>    | TACTGCCCCACCATGACCC     | GGTAGTTGCACACCACCTGA      |
| <i>SNAI1</i>  | TCGGAAGCCTAACTACAGCGA   | AGATGAGCATTGGCAGCGAG      |
| <i>SNAI2</i>  | CGAACTGGACACACATACAGTG  | CTGAGGATCTCTGGTTGTGGT     |
| <i>T</i>      | CTGGGTACTCCCAATGGGG     | GGTTGGAGAATTGTTCCGATGA    |
| <i>NODAL</i>  | CTGCTTAGAGCGGTTTCAGATG  | CGAGAGGTTGGAGTAGAGCATAA   |
| <i>MIXL1</i>  | TTTGGCTAGGCCGGAGATTAT   | GGGCTTCAGACATTTTCGTTTCAG  |

**shRNA sequences and their targets.** Related to Figure 4-6 and Fig. S5-S6.

| Target        | shRNA     | Sequence                                                         |
|---------------|-----------|------------------------------------------------------------------|
| <i>MSX2</i>   | shRNA-1-F | CCGGCCGTTCCATAGACCTGTGCTTCTCGAGAAGCAC<br>AGGTCTATGGAACGGTTTTT    |
| <i>MSX2</i>   | shRNA-1-R | AATTCAAAAACCGTTCATAGACCTGTGCTTCTCGAG<br>AAGCACAGGTCTATGGAACGG    |
| <i>MSX2</i>   | shRNA-2-F | CCGGTGCAGGCAGCGTCCATATATGCTCGAGCATATAT<br>GGACGCTGCCTGCATTTTTG   |
| <i>MSX2</i>   | shRNA-2-R | AATTCAAAAATGCAGGCAGCGTCCATATATGCTCGAG<br>CATATATGGACGCTGCCTGCA   |
| <i>TWIST1</i> | shRNA-1-F | CCGGGCATTCTGATAGAAGTCTGAACTCGAGTTCAG<br>ACTTCTATCAGAATGCTTTTT    |
| <i>TWIST1</i> | shRNA-1-R | AATTCAAAAAGCATTCTGATAGAAGTCTGAACTCGA<br>GTTTCAGACTTCTATCAGAATGC  |
| <i>TWIST1</i> | shRNA-2-F | CCGGCCTGAGCAACAGCGAGGAAGACTCGAGTCTT<br>CCTCGCTGTTGCTCAGGTTTTT    |
| <i>TWIST1</i> | shRNA-2-R | AATTCAAAAACCTGAGCAACAGCGAGGAAGACTC<br>GAGTCTTCCTCGCTGTTGCTCAGG   |
| <i>PRAME</i>  | shRNA-1-F | CCGGCCTGTGATGAATTGTTCTCCTCTCGAGAGGAG<br>AACAATTCATCACAGGTTTTTG   |
| <i>PRAME</i>  | shRNA-1-R | AATTCAAAAACCTGTGATGAATTGTTCTCCTCTCGAG<br>AGGAGAACAATTCATCACAGG   |
| <i>PRAME</i>  | shRNA-2-F | CCGGATGTTGACTTGAGGAGTTAATCTCGAGATTAAC<br>TCCTCAAGTCAACATTTTTTG   |
| <i>PRAME</i>  | shRNA-2-R | AATTCAAAAATGTTGACTTGAGGAGTTAATCTCGA<br>GATTAATCCTCAAGTCAACA      |
| <i>SOX10</i>  | shRNA-1-F | CCGGCCTCATTCTTTGTCTGAGAACTCGAGTTTCTC<br>AGACAAAGAATGAGGTTTTTG    |
| <i>SOX10</i>  | shRNA-1-R | AATTCAAAAACCTCATTCTTTGTCTGAGAACTCGAG<br>TTTCTCAGACAAAGAATGAGG    |
| <i>SOX10</i>  | shRNA-2-F | CCGGGCTGCTGAACGAAAGTGACAACCTCGAGTTGTC<br>ACTTTCGTTTCAGCAGCTTTTTG |
| <i>SOX10</i>  | shRNA-2-R | AATTCAAAAAGCTGCTGAACGAAAGTGACAACCTCGAG<br>TTGTCACCTTCGTTTCAGCAGC |

**Vector clone primer sequences.** Related to Figure 7 and Figure S7.

|                        | Primer Sequence                    |
|------------------------|------------------------------------|
| pTWIST1-1.4kb-LUC-F    | CCGCTCGAGCAGAAATGCTTAAAATGTTA      |
| pTWIST1-0.7kb-LUC-F    | CCGCTCGAGGTCAGACTGGGTCGTTGTAG      |
| pTWIST1-LUC-R          | CCCAAGCTTGAGGAGAGAGCAGGAGGACG      |
| pTWIST1-MBS1-mut-LUC-F | CTCACGTCAGGTACCGACAACCTGCTGCCCC    |
| pTWIST1-MBS1-mut-LUC-R | GGGGCAGCAGTTGTCGGTACCTGACGTGAG     |
| pTWIST1-MBS2-mut-LUC-F | GGTTTGGGAGGAACCCGGACTAGACCCCGA     |
| pTWIST1-MBS2-mut-LUC-R | TCGGGGTCTAGTCCGGGTTCCCTCCCAAACC    |
| pTWIST1-NC-mut-LUC-F   | ACGGGGGAGGGCCTGCCCTAAGCGGAAACT     |
| pTWIST1-NC-mut-LUC-R   | AGTTTCCGCTTAGGGCAGGCCCTCCCCCGT     |
| GFP-PRAME-F            | GGACTAGTGCCACCATGGACTACA           |
|                        | AGGACGACGATGACAAGGAACGAAGGCGTTTGTG |
| GFP-PRAME-R            | CTAATTAGGCATGAAACAGG               |

**ChIP-qPCR primer sequences.** Related to Figure 7.

| MBS    | Forward Primer       | Reverse Primer       |
|--------|----------------------|----------------------|
| MBS1   | GGCCGCCCGGGCCAGGTCGT | CTCCGTGCAGGCGGAAAGTT |
| MBS2   | GGCCGCCCGGGCCAGGTCGT | GGAGGAGGGACTTTTCGAAG |
| MBS-NC | GGCACCGTTGCCTCGCGCCC | AACGGTCCTTACCCGTGACC |

**Table S3. Chemical compounds. Related to Figure 1-2, 4-7 and Figure S1-S7**

| Reagent            | Cat. NO.       | Source        |
|--------------------|----------------|---------------|
| TGF- $\beta$ 1     | 100-21         | PEPROTECH     |
| TGF- $\beta$ 3     | 100-36E        | PEPROTECH     |
| bFGF               | 100-18b        | PEPROTECH     |
| CHIR99021          | S2924          | Selleck       |
| SU5402             | 572630-500UGCN | Millipore     |
| DKK1               | 120-30         | PEPROTECH     |
| IWP2               | I0536          | Sigma-Aldrich |
| Wnt3a              | 5036-WN-010    | R&D SYSTEMS   |
| Wnt5a              | 645-WN-010/CF  | R&D SYSTEMS   |
| PDGFR Inhibitor IV | 521233         | EMD Millipore |
| Activin A          | 120-14         | PEPROTECH     |
| LEFTYA             | 746-LF-025/CF  | R&D SYSTEMS   |
| SB431542           | S1067          | SELLECK       |
| BMP-4              | 120-05         | PEPROTECH     |
| Y-27632            | S1049          | SELLECK       |
| DAPT               | D5942          | Sigma-Aldrich |
| IFN $\gamma$       | 300-02         | PEPROTECH     |
| Imatinib           | CDS022173      | Sigma-Aldrich |
| RA                 | R2625          | Sigma-Aldrich |
| DAC                | A3656          | Sigma-Aldrich |
| BIO                | B1686          | Sigma-Aldrich |

## **Supplemental Experimental Procedures**

### **Cell culture**

hESC lines (H1 and H9) and hiPSC (BC1 and Z-15) were maintained in E8 Essential medium (Gibco) on Matrigel (Stem Cell Technologies) and passaged at a dilution of 1:6 every 4-6 days. The HEK-293T cells were cultured in DMEM (Invitrogen) containing 10% fetal bovine serum (FBS) (Hyclone) and were passaged every 2-3 days. hBM-MSCs were a kind gift from professor Zhongchao Han, which were derived from fresh bone marrow aspirates donated by healthy adults (range 20–56 years) under approval of research ethics (approval no. KT2014005-EC-1) as described previously (Lu et al., 2017). BM-MSCs were cultured in DMEM-F12 (Gibco) media containing 10% FBS, 1% L-Glutamine (Gibco) and 1% NEAA (Gibco). BM-MSCs were passaged every 3-5 days. BM-MSCs at passages 3-8 were used throughout the study.

### **Western Blotting Analysis**

Western blotting analysis was performed as describe previously (Wu et al., 2015). For the detection of target genes expression in protein level,  $5 \times 10^6$  were lysed with 150 $\mu$ l laemmli sample buffer (BioRad) and inactivated in 100°C for 5min as we previously did. The samples were electrophoresed on a 10% SDS-PAGE gel and then transferred onto a PVDF membrane (GE Healthcare Life Sciences). The membranes were blocked using 5% nonfat milk (BD) diluted in TBST (PBS containing 0.1% Tween 20) at room temperature for 1 h before being incubated with primary antibody at 4 °C overnight. After being washed with TBST for three times (5 min each), the membranes were incubated with HRP-conjugated secondary antibody (GE Healthcare) at room temperature for 2 h. After three washing using TBST, proteins were detected using the ECL Detection Reagent (Thermo). Finally, the blots were developed by using the Super-Signal West Pico Chemiluminescent Substrate (Pierce). Antibodies used are listed in Supplemental Table S1.

### **Flow Cytometric Analysis**

Differentiated cells were dissociated into single cells using 0.05% Trypsin/EDTA and the cells were stained with the indicated antibodies (listed in Supplemental Table S1) in 0.2% BSA. After incubation for 30 min at room temperature in dark, the cells were washed twice with cold PBS and analyzed using FACS Canto II (BD Biosciences). 7-aminoactinomycin D (7AAD) staining was used for dead cells

exclusion. Data were analyzed with FlowJo software (Tree Star, Ashland, OR). Antibodies used are listed in Supplemental Table S1.

### **qRT-PCR**

Total RNA was harvest with TRIzol reagent (Thermo) according to the manufacturer's instruction and quantified by using NanoDrop 2000 (Thermo). cDNA was synthesized by reverse transcriptase kit (Promaga). qRT-PCR assay was performed with SYBR Green (Qiagen) using the ABI PRISM 7900 (Applied Biosystems). The primer sequences are listed in Supplemental Table S2.

### **Standard Colony Forming Assay (CFU-F) of MSCs**

Standard Colony Forming Assay (CFU-F) of MSCs was performed as previously reported(Meng et al., 2013). Briefly, hBM-MSCs or MSCs derived from hPSCs were detached with 0.05% trypsin and seeded at a density of 100 cells per 10cm dish and cultured in DMEM-F12 (Gibco) supplemented with 10% FBS, 1% L-Glutamine (Gibco) and 1% NEAA (Gibco), 0.5 $\mu$ M CHIR99021 (Selleck). 2 weeks later, the colonies were washed with 1 $\times$ PBS, fixed with 4% PFA (Gibco) before staining with 0.2% Crystal Violet Solution (Solarbio). The colonies in 10 cm dish was scanned (Canon).

### **Tri-lineage Differentiation of MSCs**

MSCs derived from hPSCs and BM-MSCs were used for adipogenic, osteogenic, and chondrogenic differentiation potential analyses were performed as described previously (Vodyanik et al., 2010; Zhang et al., 2017). All qRT-PCR primer sequences are available in Supplemental Table S2.

For adipogenic differentiation, MSCs derived from hPSCs or BM-MSCs were cultured in adipogenic differentiation medium, which contains IMDM (Gibco), 10% FBS (Hyclone), 1mM Dexamethasone (Sigma), 500 $\mu$ M IBMX (Sigma), 10 $\mu$ g/ml Insulin, 60 $\mu$ M Indomethacin and 2mM L-Glutamine (Gibco). After 3 weeks of culture with medium changed every 3 days, the cells were analyzed using Oil Red O staining and qRT-PCR.

For osteogenic differentiation, MSCs derived from hPSCs or BM-MSCs were maintained in osteogenic differentiation medium containing IMDM (Gibco), 10% FBS (Hyclone), 100nM Dexamethasone (Sigma), 50 $\mu$ g/ml Ascorbic acid (Sigma), 10 $\mu$ M  $\beta$ -Glycerophosphate (Sigma), 2mM L-Glutamine (Gibco) and 1 $\times$  Nonessential amino acids (Gibco). The medium was changed every 3 days. After 3

weeks of culture, the cells were subjected to Von Kossa staining and harvested for qRT-PCR analysis. For chondrogenic differentiation, MSCs derived from hPSCs or BM-MSCs were cultured in chondrogenic differentiation medium consisting of IMDM (Gibco) supplemented with 10% FBS (Hyclone), 100nM Dexamethasone (Sigma), 50µg/ml Ascorbic acid (Sigma), 40µg/ml Proline, 10ng/ml TGF-β3, 100µg/ml Sodium Pyruvate, 2mM Insulin-Transfer-S (Gibco), 53.5µg/ml Lindeic acid, Glycerophosphate (Sigma) and 12.5µg/ml BSA (Sigma). The medium was changed every 3 days. After 3 weeks, the cells were used for Alcian Blue staining assay and collected for qRT-PCR analysis.

### **Transplantation of MSCs into Immunocompromised Mice**

The mouse model of *in vivo* bone formation by MSCs was performed as previously reported(Deng et al., 2016) with minor modification(Deng et al., 2016). All animal studies were approved (approval no. KT2016011-EC-1) by Laboratory Animal Center of Institute of Hematology & Blood Diseases Hospital, Chinese Academy of Medical Sciences & Peking Union Medical College (license no. SCXK & SYXK 2005-0001, Tianjin). Briefly,  $2 \times 10^6$  hBM-MSCs or MC-MSCs derived from DOX-inducible GFP-MSX2 overexpressing H1 hESCs under DOX+SMs conditions at day 7 of hPSC-MSCs were mixed with hydroxyapatite/tricalcium phosphate (HA/TCP) scaffolds. Then, the hBM-MSCs and MC-MSCs were transplanted into the left and right dorsal subcutaneous sites of 6-week nude mice, respectively. 8 weeks later, all of the mice were euthanized and the transplants of each mouse were collected and fixed with 4% formaldehyde for 48h. The formed bone *in vivo* was identified by haematoxylin and eosin (H&E) staining and photographed by inverted microscope (Nikon).

### **Population Doublings Assay**

MSCs derived from hPSCs and BM-MSCs were serially passaged in six-well plates for 10 passages. Briefly, cells cultured in six-well plates were trypsinized and re-cultured in a new six-well plate at  $1.0 \times 10^4$  cells/cm<sup>2</sup> when they reached 90% confluency. Population doublings (PD) was calculated as follows(Meng et al., 2013; Umeda et al., 2015; Wei et al., 2012):  $NPD = (\log_{10} [N_p] - \log_{10} [N_s]) / \log_{10}$ , where  $N_p$  represents the harvested cell number before passage and  $N_s$  represents the seeded cell number at each passage, respectively.

### **Inflammatory Response of MSCs to IFNγ *in vitro***



To evaluate the inflammatory response of MSCs to inflammatory factor IFN $\gamma$ , MC-MSCs or hBM-MSCs were detached with 0.05% trypsin and cultured in 24-well plate with DMEM-F12 (Gibco) containing 10% FBS, 1% L-Glutamine (Gibco) and 1% NEAA (Gibco). After being treated with 10ng/ml human IFN- $\gamma$  (PeproTech) for 24h, the cells were collected for RNA isolation with TRIzol reagent (ThermoFisher). The expression level of inflammatory factors was detected by Real-time PCR with the SYBR reagent (Life) and 7900HT Fast Real-time PCR System (ThermoFisher). Primers for detection of IL-6, IDO1 and TGF $\beta$  were synthesized (Invitrogen) and listed in Table S2.

### **In Vitro Assays of T Cell Proliferation**

The inhibition analysis of T lymphocyte proliferation by MSCs *in vitro* was performed as previously described(Wang et al., 2016) with minor modification. T lymphocytes were isolated from spleen and mesenteric lymph nodes of 6-week male C57 BL/6 mice. Briefly, the total cells were labelled with PE-CD3e (BioLegend) and T lymphocyte were enriched by fluorescence-activated cell sorter (BD FACSAria IIIu). Then, the sorted CD3<sup>+</sup> T lymphocytes were labeled with 5- $\mu$ M FITC-CFSE (Invitrogen)  $2 \times 10^4$  MC-MSC or BM-MSCs were mixed with  $1 \times 10^5$  CFSE labelled CD3<sup>+</sup> T cells per well in a 96-well plate and cultured in 1640 basal medium (Gibco) supplemented with 10% FBS (Austria) at 100  $\mu$ l/well. For CD4<sup>+</sup> T lymphocyte proliferation analysis, the CD3<sup>+</sup> T cells were stimulated with plate-bound 1  $\mu$ g/ml anti-CD3 antibody (BD Bioscience) and 2  $\mu$ g/ml anti-CD28 antibody (eBioscience). For CD8<sup>+</sup> T lymphocyte proliferation analysis, the CD3<sup>+</sup> T cells were stimulated with molecular probes sulfate latex (Invitrogen). After stimulation for 72 h, the cells were harvested and stained with anti-CD4 and Anti-CD8 antibodies (BD Bioscience). The CD4<sup>+</sup> or CD8<sup>+</sup> population was gated for CFSE dilution analysis.

### **Mouse Model of Dextran Sulfate Sodium (DSS)-induced Colitis**

The DSS-induced colitis model was performed as previously described(Wang et al., 2016). Briefly, 8-week male C57BL/6 mice were administered with drinking water containing 2% DSS (BioWest) for 6 days.  $1 \times 10^6$  human BM-MSCs or MC-MSCs derived from hPSCs in PBS or PBS alone (a vehicle control) were injected i.p. into animals on day 2 and 3 after the start of the DSS treatment. The mice untreated drinking water were used as control. Body weight of the mice was monitored every day from

day 0 to day 13. The stool consistency, rectal bleeding and body weight (Wang et al., 2016) of mice were used to evaluate the severity of colitis as follows: 0, normal; 1, soft; 2, soft but formed; 3, liquid. All of the mice were euthanized at day 13. Upon necropsy, the colon of each mouse was dissected from each mouse and its length was measured. After being flushed with  $1 \times$  DPBS, the colons were fixed with 4% formaldehyde for at least 48h. The distal part of the colon was used for haematoxylin and eosin (H&E) staining.

#### **MSC Potential Analysis of CD271<sup>+</sup> NCCs or CD271<sup>-</sup> cells from hPSCs**

To evaluate the MSC potential of NCCs, the isolated CD271<sup>+</sup> NCCs or CD271<sup>+</sup> cells at day 3 of MSC induction were seeded into 12-well plates coated with growth factor-reduced gel (Stem Cell Technologies) at a density of  $2 \times 10^4$ /ml and cultured in DMEM/F12 media supplemented with 2% FBS, 4 ng/ml TGF $\beta$ 1, 4 ng/ml bFGF, 0.5  $\mu$ M CHIR99021 and 20 nM Decitabine) and 3  $\mu$ g/ml DOX for 4 days. Then, the cells were dissociated into single cells using 0.05% Trypsin/EDTA and stained with the indicated antibodies (listed in Supplemental Table S1) in 0.2% BSA for FCM analysis.

#### **Differentiation of hPSCs into Mesoendoderm-derived MSCs**

Differentiation of hPSCs into mesoendoderm-derived MSCs was performed as previously reported (Tran et al., 2012) with minor modification. Briefly, to induce mesoendoderm, hPSCs clumps were seeded onto GFR-coated dishes in Custom TeSR (Stem Cell Tech) containing 5ng/ml Activin A (Peprtech), 2 $\mu$ M BIO (Sigma) and 20ng/ml BMP4 (Peprtech) for 3 days. Then, the derived cells were further induced into MSCs with MSC-induction medium containing 90%  $\alpha$ -MEM (Gibco), 10% FBS (Hyclone), 10ng/ml EGF (Peprtech) and 10ng/ml bFGF (Peperotech) for 10 days. Finally, the cells were dissociated into single cells using 0.05% Trypsin/EDTA and stained with the indicated antibodies (listed in Supplemental Table S1) in 0.2% BSA for FCM analysis.

#### **Differentiation of hPSCs into Trophoblast-derived MSCs (TB-MSCs)**

Differentiation of hPSCs into mesoderm-derived MSCs was performed as previously reported (Wang et al., 2016) with minor modification. Briefly, for trophoblast (TB) induction, hPSCs clumps were seeded onto GFR-coated dishes in Custom TeSR (Stem Cell Tech) containing 10 $\mu$ M SB431542 (Selleck) and 10ng/ml BMP4 (Peprtech) for 7 days. Then, the derived cells were further induced into MSCs with 80%

$\alpha$ -MEM (Gibco), 20% FBS (Hyclone), 1 $\times$ NEAA(Gibco) and 1% L-Glutamine (Gibco) for 6 days. Finally, the cells were dissociated into single cells using 0.05% Trypsin/EDTA and stained with the indicated antibodies (listed in Supplemental Table S1) in 0.2% BSA for FCM analysis.

### **Bioinformatics Analysis**

Heatmap was generated using HemI heatmap illustrator software (GPS) or R language. Gene ontology (GO) was conducted using the online tool (<http://geneontology.org/> or <http://david.abcc.ncifcrf.gov/>). Pathway enrichment analysis was performed using Ingenuity Pathway Analysis (IPA 1.0 version) software or KEGG website (<http://www.kegg.jp/>). Principal component analysis (PCA) were completed in ClustVis website (<http://biit.cs.ut.ee/clustvis/>). The Venn map was generated in Venny 2.1 website (<http://bioinfo.gp.cnb.csic.es/tools/venny/index.html>).

### **Lentivirus Production**

For knockdown of gene expression, shRNAs targeting MSX2, TWIST1, PRAME and SOX10 were cloned into pLKO.1 vector (Addgene), while a scramble shRNA (Scr) was used as a control. For overexpression of genes, the coding sequence of PRAME or TWIST1 was inserted into psin-EF1a-GFP vector. The lentivirus was packed and collected as described previously(Wu et al., 2015). The sequences of shRNAs are listed in Supplemental Table S2.

### **Construct Generation**

For sgRNA-mediated MSX2 knockout by CRISPR/Cas9 system, lentivirus-based CRISPR-Cas9-Lenti-V2 vector containing sgRNAs designed with the CRISPR design website (<http://tools.genome-engineering.org>) were used.

For shRNA-mediated MSX2, TWIST1, PRAME and SOX10 knock-down, lentivirus-based pLKO.1 vectors (Addgene) containing various shRNA target sequences (Sigma-Aldrich) (See Supplemental Table S2) were used to package virus according to the manufacturer's instructions (Viralpower Lentivirus Packaging System, Invitrogen).

Construct carrying PRAME were generated from the coding sequence of PRAME (from cDNA of H1 hESC-derived MSC-like cells by exogenous MSX2 overexpression for 7 days). The coding sequence was finally cloned into SpeI and BmtI double digested psin-EF1a-GFP vector for further

experiment.

The reporter constructs of pTWIST1-0.7kb-LUC and pTWIST1-1.4kb-LUC were cloned from H1 hESC genomic DNA, then cloned into Xho I and Hind III double digested pGL3 vector (Promega). The two MSX2 binding sites (MBS), MBS1 (CCAATGAC) and MBS2 (CGAATTGT) on pTWIST1-0.7kb-LUC construct were predicted by JASPAR website ([http://jaspar.genereg.net/cgi-bin/jaspar\\_db.pl](http://jaspar.genereg.net/cgi-bin/jaspar_db.pl)). The pTWIST1-0.7kb-LUC construct containing MSX2 binding-site (MBS) mutants were generated by recombinant PCR. Primer sequences used for construct generation are provided in Supplemental Table S2.

### **Reporter Assay**

For MSX2 target analysis, HEK-293T cells, H1 hESCs or BC1 hiPSCs were co-transfected with 0.5 $\mu$ g of pTWIST1-LUC reporter construct and 0.5 $\mu$ g of psin-EF1a-MSX2 using FuGene HD transfection reagent (Promega). 0.05 $\mu$ g of Renilla plasmid was co-transfected as an internal control. 48 h or 72 h after transfection, cells were harvested for luciferase activity measurement. Luciferase activity was determined using Dual-Luciferase assay (Promega) according to the Manufacturer's Instruction. All assays were carried out in triplicate. Details for the construction of pTWIST1-LUC, MSX2 binding site mutants are available in Supplemental Table S2.

### **Chromatin immunoprecipitation (ChIP) assay**

3 $\times$ 10<sup>7</sup> GFP-MSX2 H1 hESCs were collected for ChIP assay after treatment with treated with DOX (3 $\mu$ g/ml) for 7 days. ChIP assay was performed using the Magna ChIP™ A/G kit (Millipore) following the Manufacturer's Instructions. The primers designed to detect the enrichment of the fragments are available in Supplemental Information, Supplemental Table S2.

### Supplemental References

- Deng, P., Zhou, C., Alvarez, R., Hong, C., and Wang, C.Y. (2016). Inhibition of IKK/NF-kappaB Signaling Enhances Differentiation of Mesenchymal Stromal Cells from Human Embryonic Stem Cells. *Stem cell reports* 6, 456-465.
- Lu, S., Ge, M., Zheng, Y., Li, J., Feng, X., Feng, S., Huang, J., Feng, Y., Yang, D., Shi, J., *et al.* (2017). CD106 is a novel mediator of bone marrow mesenchymal stem cells via NF-kappaB in the bone marrow failure of acquired aplastic anemia. *Stem cell research & therapy* 8, 178.
- Meng, X., Su, R.J., Baylink, D.J., Neises, A., Kiroyan, J.B., Lee, W.Y., Payne, K.J., Gridley, D.S., Wang, J., Lau, K.H., *et al.* (2013). Rapid and efficient reprogramming of human fetal and adult blood CD34+ cells into mesenchymal stem cells with a single factor. *Cell research* 23, 658-672.
- Tran, N.T., Trinh, Q.M., Lee, G.M., and Han, Y.M. (2012). Efficient differentiation of human pluripotent stem cells into mesenchymal stem cells by modulating intracellular signaling pathways in a feeder/serum-free system. *Stem cells and development* 21, 1165-1175.
- Umeda, K., Oda, H., Yan, Q., Matthias, N., Zhao, J., Davis, B.R., and Nakayama, N. (2015). Long-term expandable SOX9+ chondrogenic ectomesenchymal cells from human pluripotent stem cells. *Stem cell reports* 4, 712-726.
- Vodyanik, M.A., Yu, J., Zhang, X., Tian, S., Stewart, R., Thomson, J.A., and Slukvin, II (2010). A mesoderm-derived precursor for mesenchymal stem and endothelial cells. *Cell stem cell* 7, 718-729.
- Wang, X., Lazorchak, A.S., Song, L., Li, E., Zhang, Z., Jiang, B., and Xu, R.H. (2016). Immune modulatory mesenchymal stem cells derived from human embryonic stem cells through a trophoblast-like stage. *Stem cells* 34, 380-391.
- Wei, H., Tan, G., Manasi, Qiu, S., Kong, G., Yong, P., Koh, C., Ooi, T.H., Lim, S.Y., Wong, P., *et al.* (2012). One-step derivation of cardiomyocytes and mesenchymal stem cells from human pluripotent stem cells. *Stem cell research* 9, 87-100.
- Wu, Q., Zhang, L., Su, P., Lei, X., Liu, X., Wang, H., Lu, L., Bai, Y., Xiong, T., Li, D., *et al.* (2015). MSX2 mediates entry of human pluripotent stem cells into mesendoderm by simultaneously suppressing SOX2 and activating NODAL signaling. *Cell research* 25, 1314-1332.
- Zhang, X., Yang, Y., Zhang, L., Lu, Y., Zhang, Q., Fan, D., Zhang, Y., Zhang, Y., Ye, Z., and Xiong, D. (2017). Mesenchymal stromal cells as vehicles of tetravalent bispecific Tandab (CD3/CD19) for the treatment of B cell lymphoma combined with IDO pathway inhibitor D-1-methyl-tryptophan. *Journal of hematology & oncology* 10, 56.
